# Supplementary material for: A facile sonochemical synthesis of the Zn-based metal–organic framework for electrochemical sensing of paracetamol
Source: Royal Society of Chemistry journal article supplement (doi:10.1039/d4ma00061g), 2024-01-01
Supplement: d4ma00061g1.pdf [file d4ma00061g1.pdf]

## A facile Sonochemical synthesis of Zn-based metal-organic framework for electrochemical sensing of paracetamol

Khaled M. Ismail, Safaa S. Hassan, Shymaa S. Medany, Mahmoud A. Hefnawy\*

Department of Chemistry, Faculty of Science, Cairo University, Giza, Egypt

### i) NMR spectra study

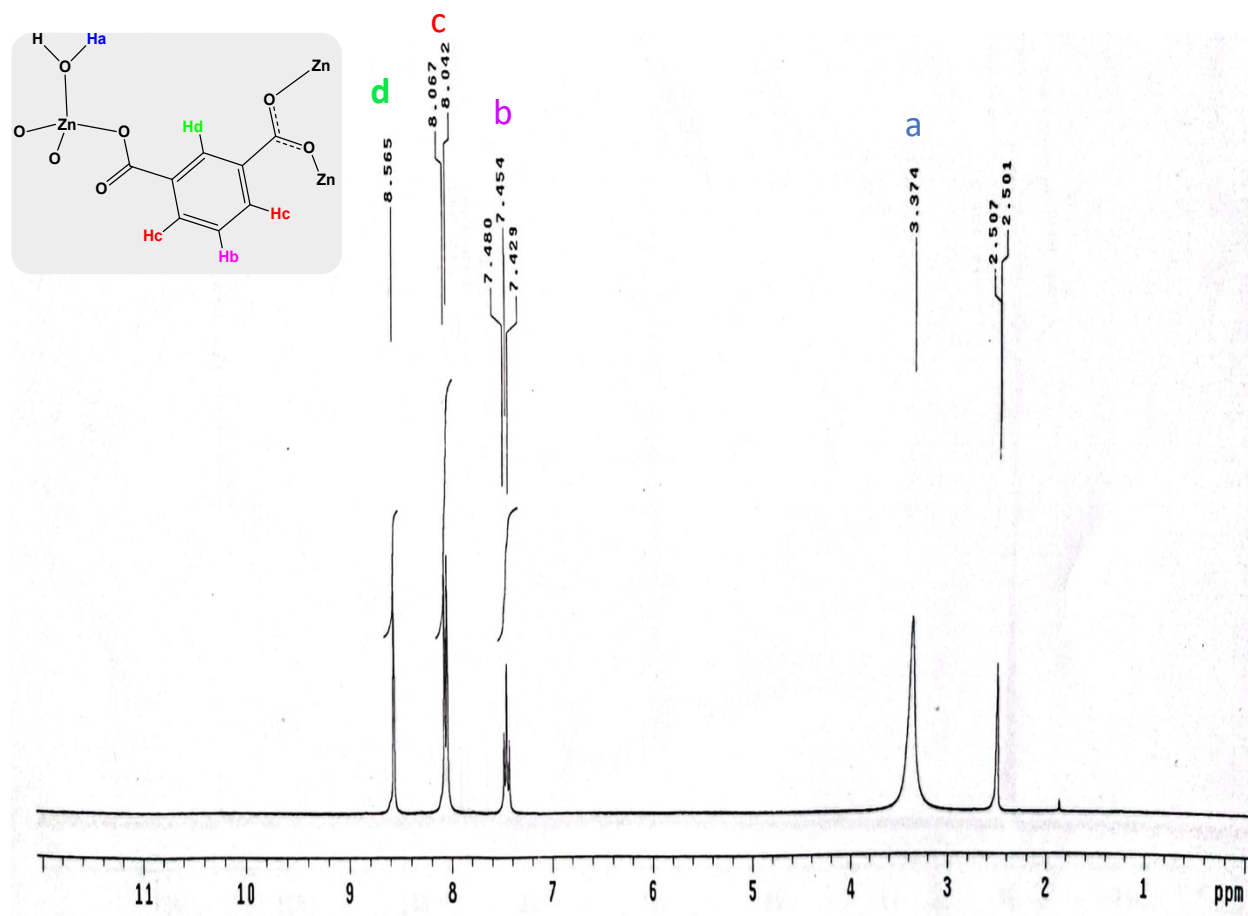

Figure S1. <sup>1</sup>H NMR spectra of [Zn(BDC)(H<sub>2</sub>O)]

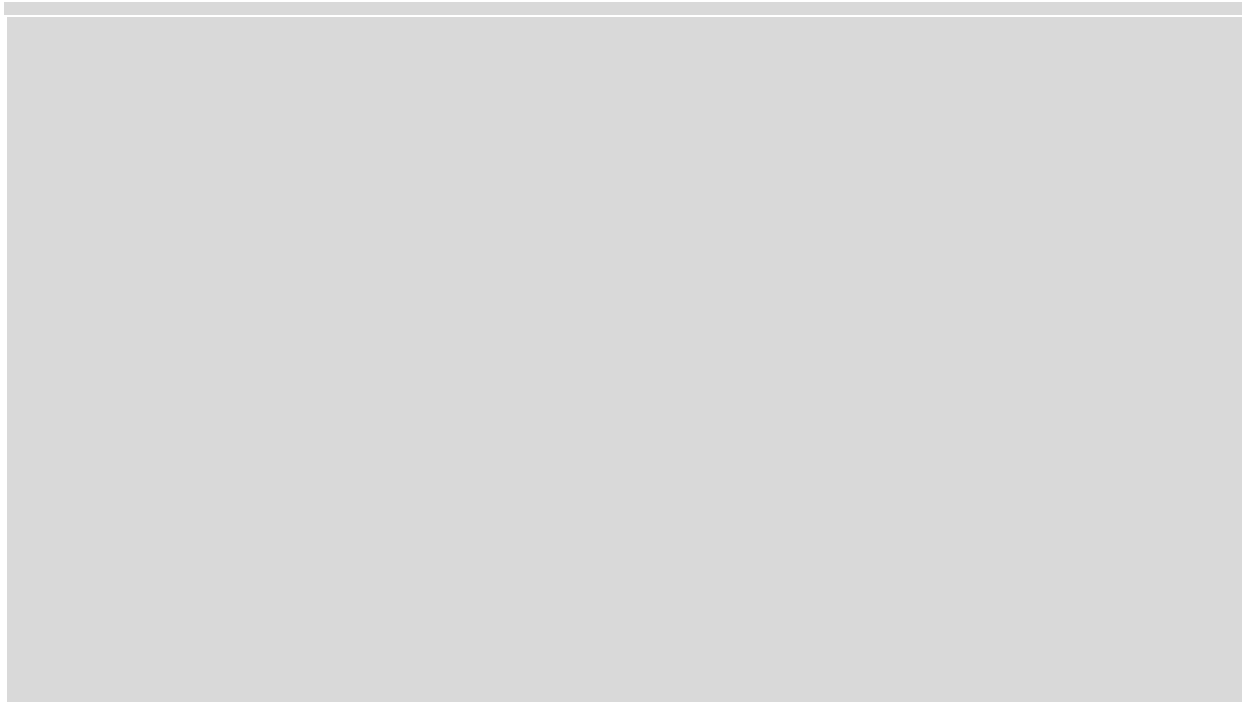

Figure S2.  $^{13}\text{C}$  NMR spectra of  $[\text{Zn}(\text{BDC})(\text{H}_2\text{O})]$

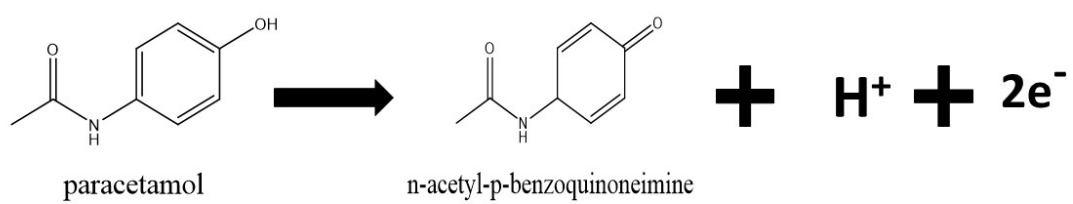

Figure S3. Representation of conversion of paracetamol to n-acetyl-p-benzoquinoneimine.

## ii) Theoretical study of paracetamol adsorption.

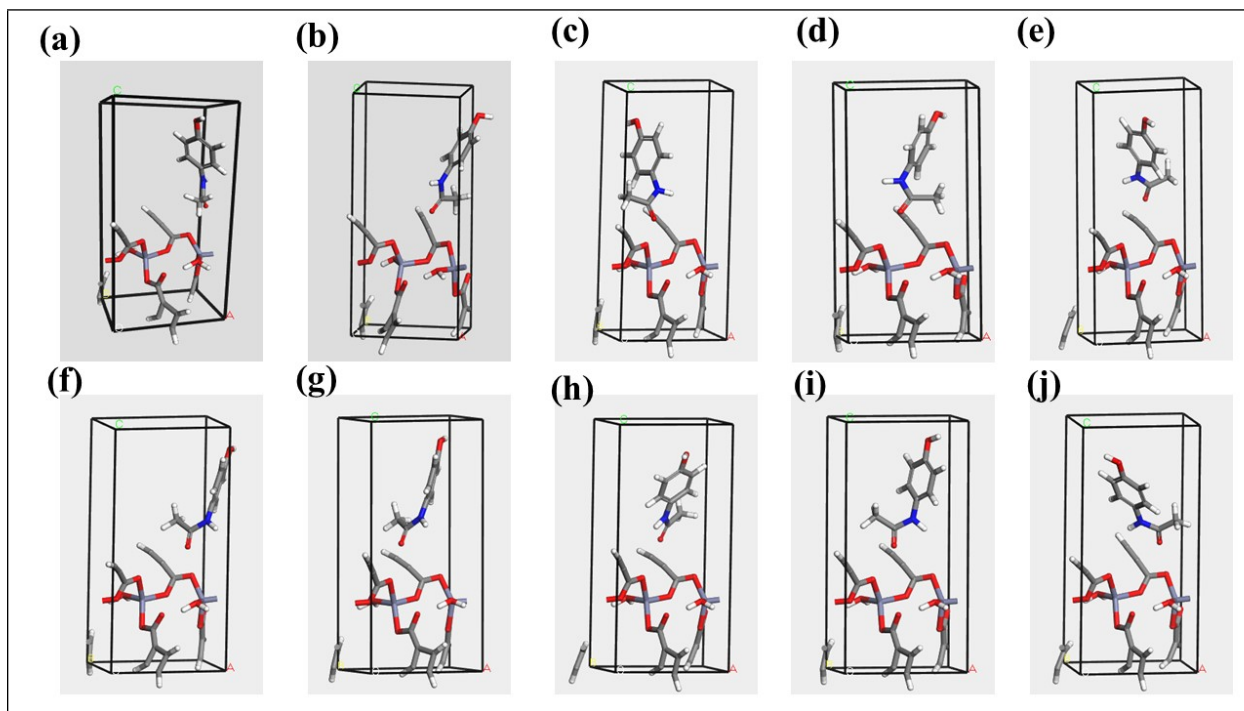

Figure S4: different adsorption possibilities for Zn-MOF {002} surface.

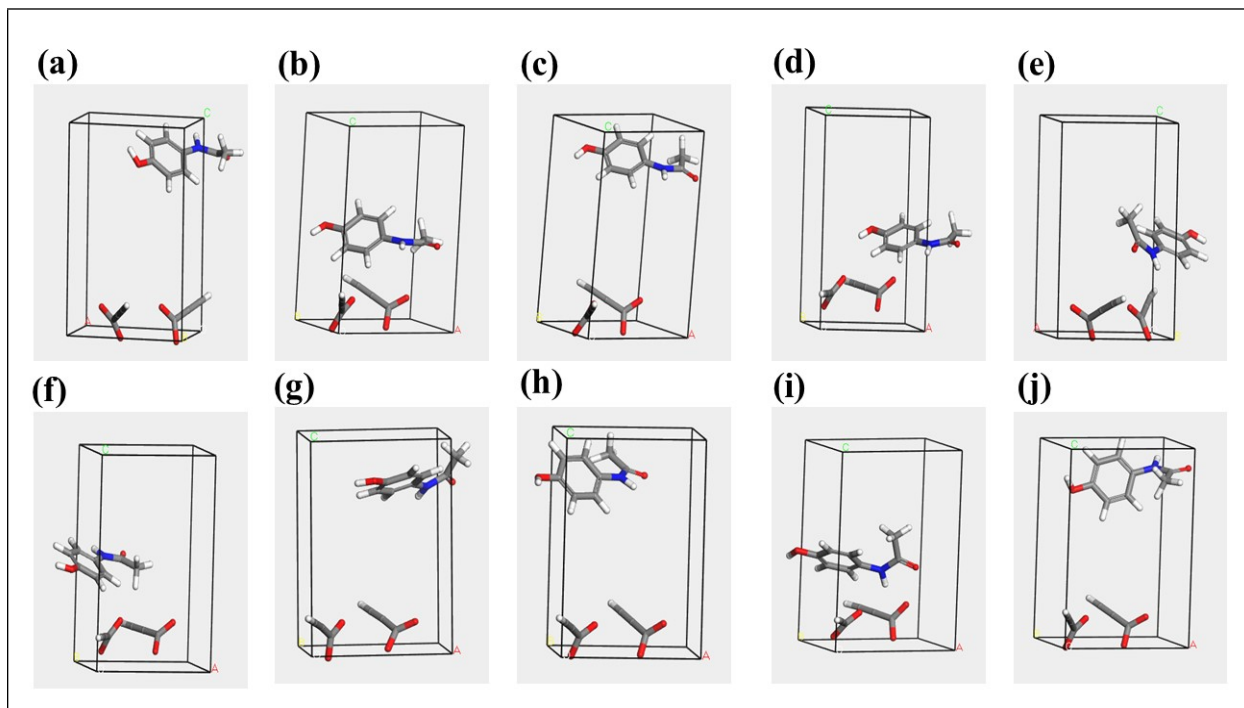

Figure S5: different adsorption possibilities for Zn-MOF {006} surface.
